# Supplementary material for: Sandwich-type (η6-p-cymene)Ru(η5-thiophene) complexes: synthesis, spectroscopic and electrochemical characterization, and antimicrobial activity
Source: Royal Society of Chemistry journal article supplement (doi:10.1039/d4nj04775c), 2025-01-01
Supplement: d4nj04775c1.pdf [file d4nj04775c1.pdf]

Supplementary Information

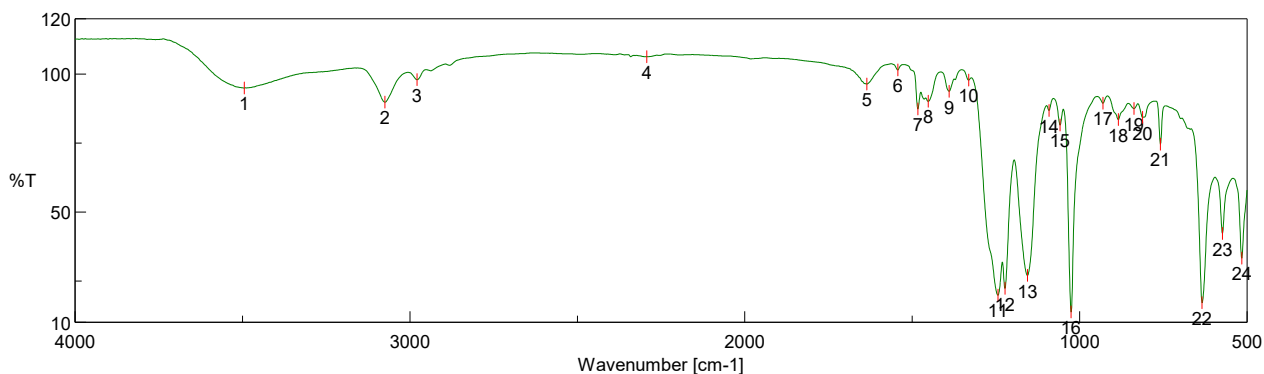

[ Result of Peak Picking ]

| No. | Position | Intensity | No. | Position | Intensity | No. | Position | Intensity |
|-----|----------|-----------|-----|----------|-----------|-----|----------|-----------|
| 1   | 3494     | 94.9176   | 2   | 3075     | 89.7686   | 3   | 2979     | 97.9145   |
| 4   | 2293     | 106.237   | 5   | 1635     | 96.3862   | 6   | 1543     | 101.491   |
| 7   | 1483     | 87.3402   | 8   | 1452     | 90.1129   | 9   | 1389     | 93.7227   |
| 10  | 1332     | 97.785    | 11  | 1244     | 19.8158   | 12  | 1223     | 22.2915   |
| 13  | 1156     | 26.9864   | 14  | 1092     | 86.7606   | 15  | 1059     | 81.5273   |
| 16  | 1026     | 13.7494   | 17  | 930      | 89.398    | 18  | 884      | 83.4578   |
| 19  | 838      | 87.4704   | 20  | 812      | 84.2682   | 21  | 759      | 74.5611   |
| 22  | 634      | 17.135    | 23  | 574      | 42.183    | 24  | 516      | 33.2534   |

Figure S1. FT-IR spectra of complex Ru-1.

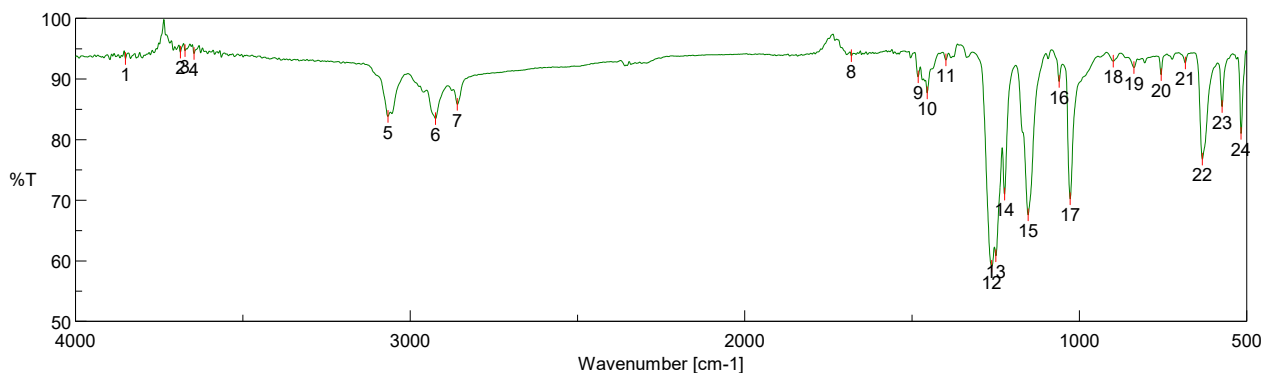

[ Result of Peak Picking ]

| No. | Position | Intensity | No. | Position | Intensity | No. | Position | Intensity |
|-----|----------|-----------|-----|----------|-----------|-----|----------|-----------|
| 1   | 3851     | 93.34     | 2   | 3686     | 94.42     | 3   | 3673     | 94.6801   |
| 4   | 3646     | 94.2036   | 5   | 3066     | 83.8163   | 6   | 2925     | 83.4536   |
| 7   | 2859     | 85.7969   | 8   | 1682     | 93.8347   | 9   | 1482     | 90.3395   |
| 10  | 1455     | 87.6786   | 11  | 1399     | 93.122    | 12  | 1262     | 59.0777   |
| 13  | 1250     | 60.8128   | 14  | 1224     | 70.9811   | 15  | 1153     | 67.5587   |
| 16  | 1061     | 89.5923   | 17  | 1028     | 70.236    | 18  | 899      | 92.9349   |
| 19  | 837      | 91.8782   | 20  | 756      | 90.7185   | 21  | 684      | 92.6372   |
| 22  | 633      | 76.7674   | 23  | 574      | 85.43     | 24  | 517      | 80.9983   |

Figure S2. FT-IR spectra of complex Ru-2.



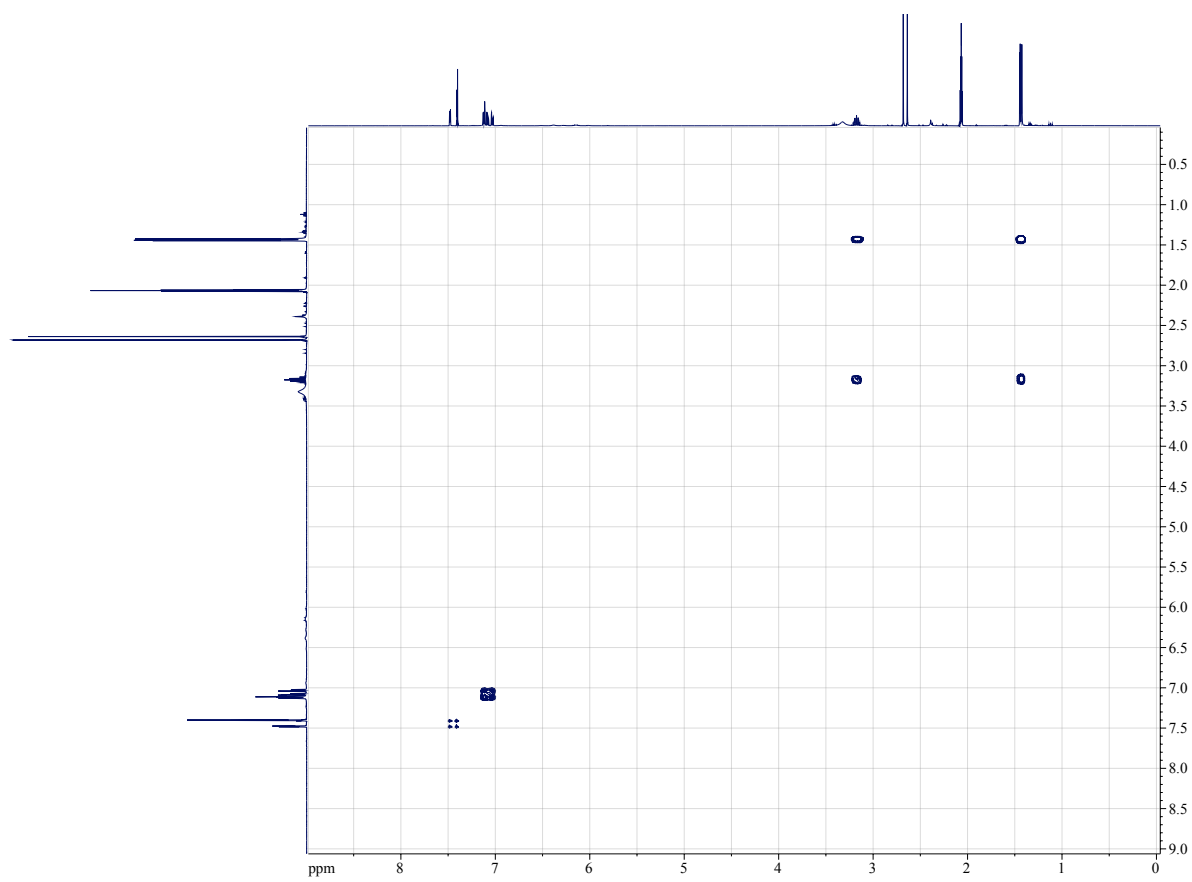

Figure S5. 2D COSY spectrum of Ru-1 (acetone d6).

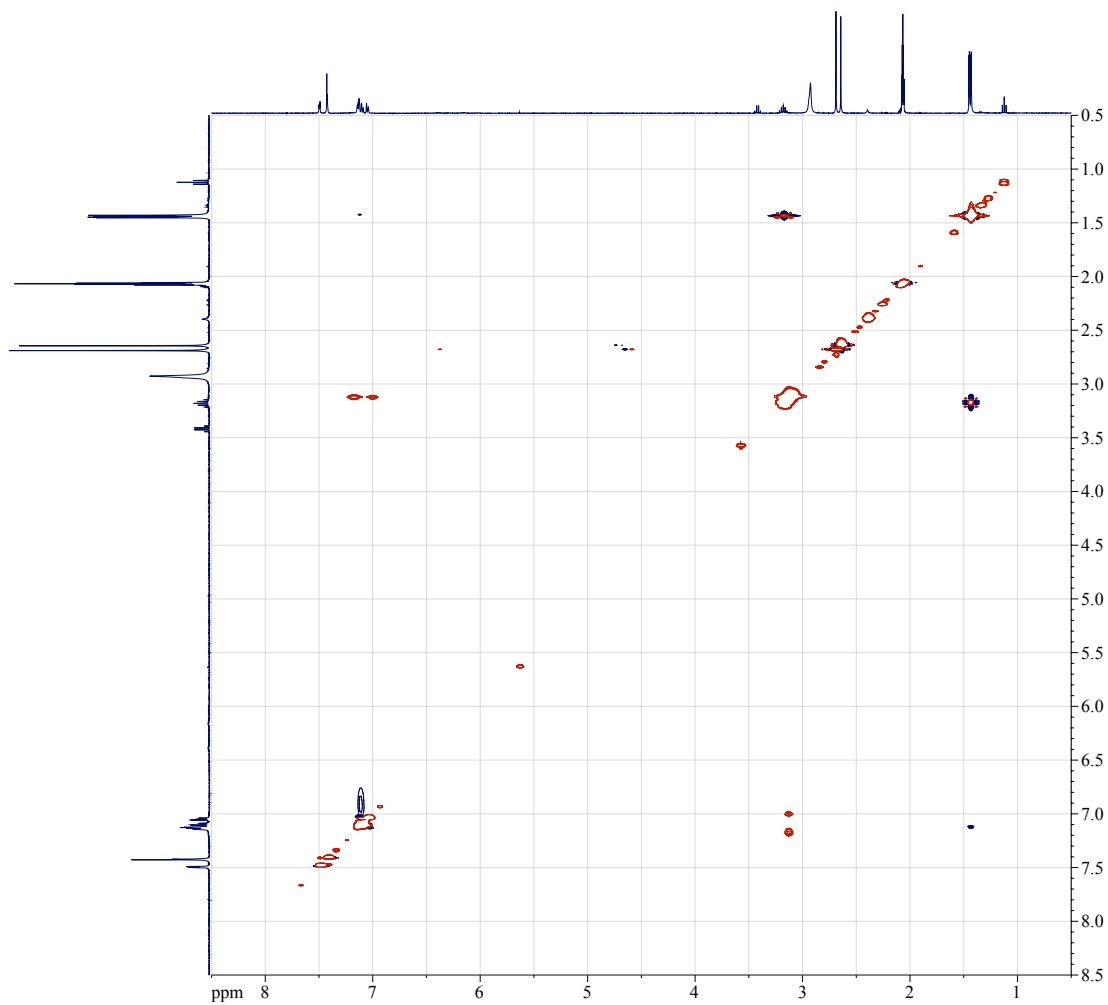

Figure S6. 2D NOESY spectrum of Ru-1 (acetone d6).

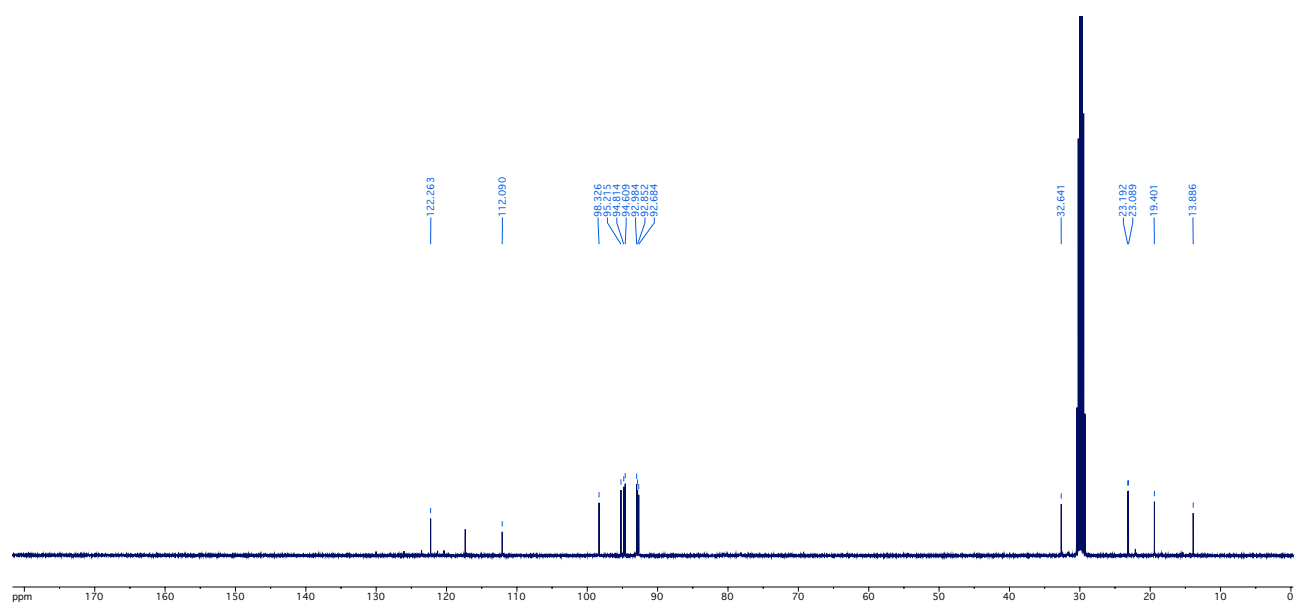

Figure S7.  $^{13}\text{C}$  NMR spectrum of Ru-1 (acetone d6).

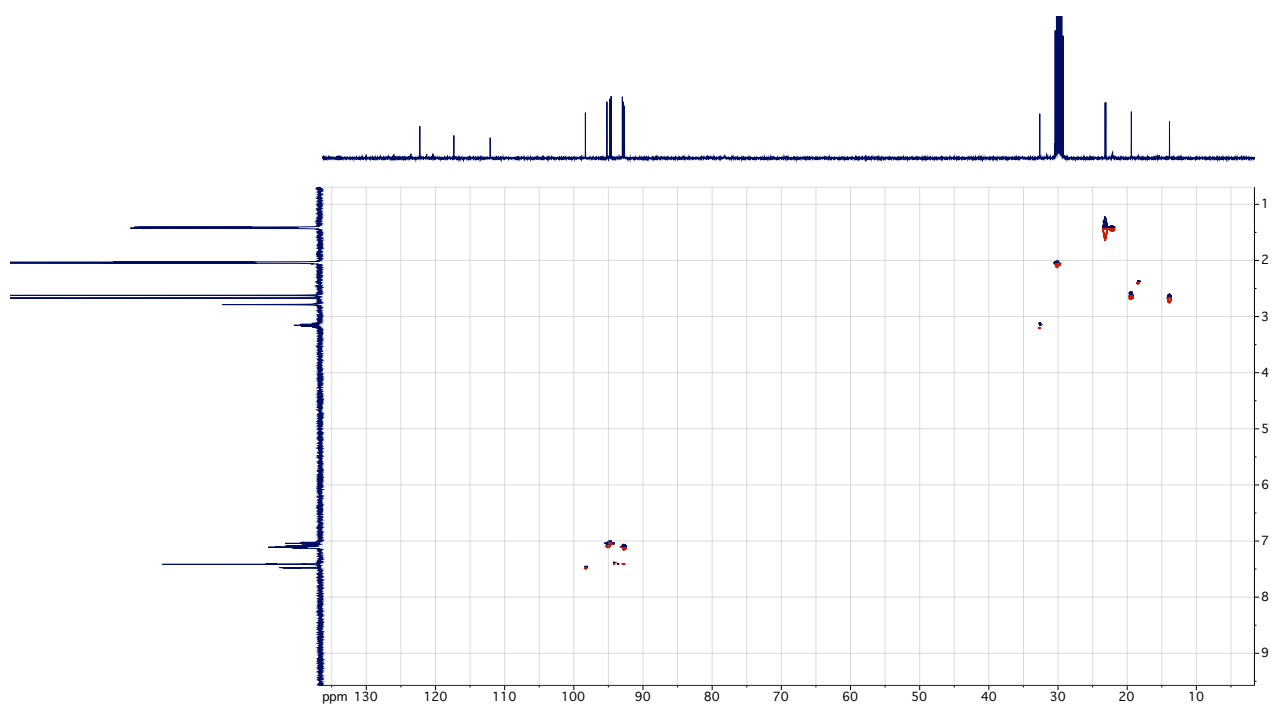

Figure S8. H-C HSQC spectrum of Ru-1 (acetone d6).

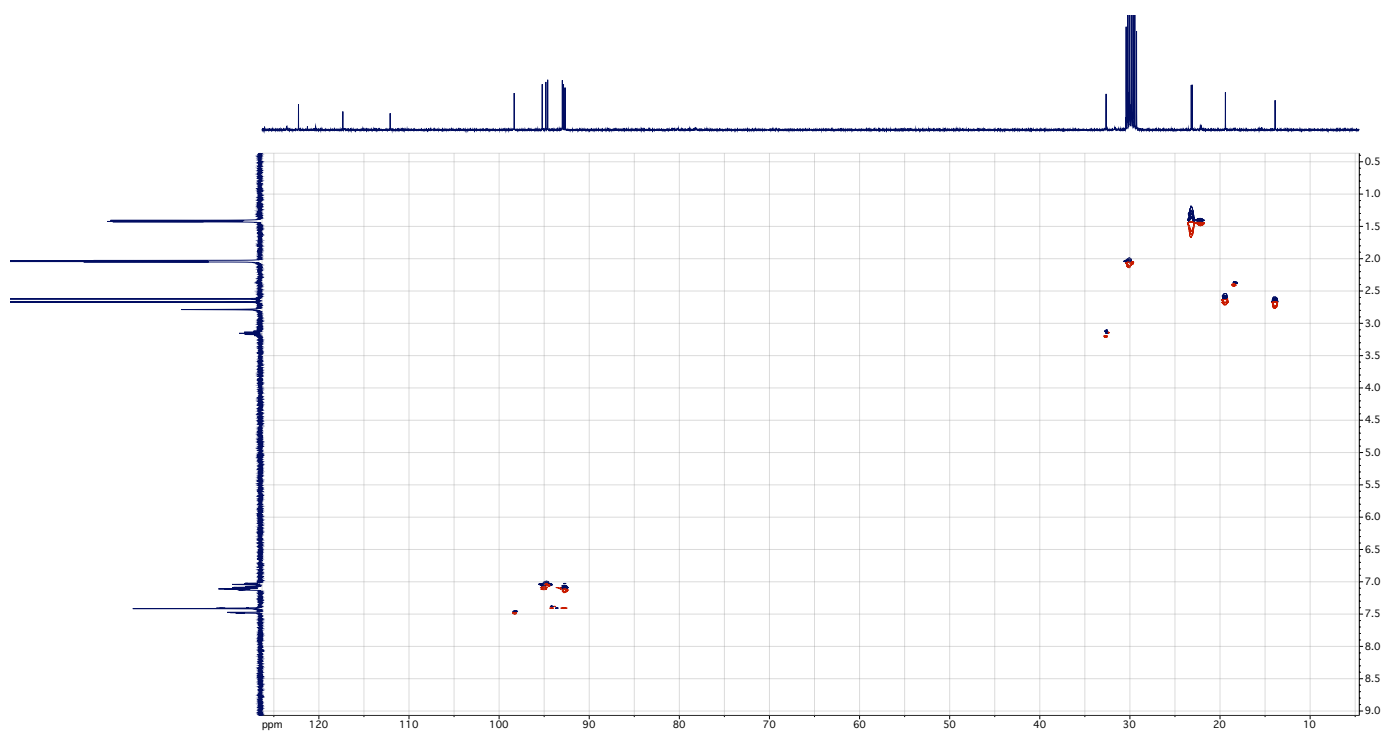

Figure S9. H-C HMBC spectrum of Ru-1 (acetone d6).

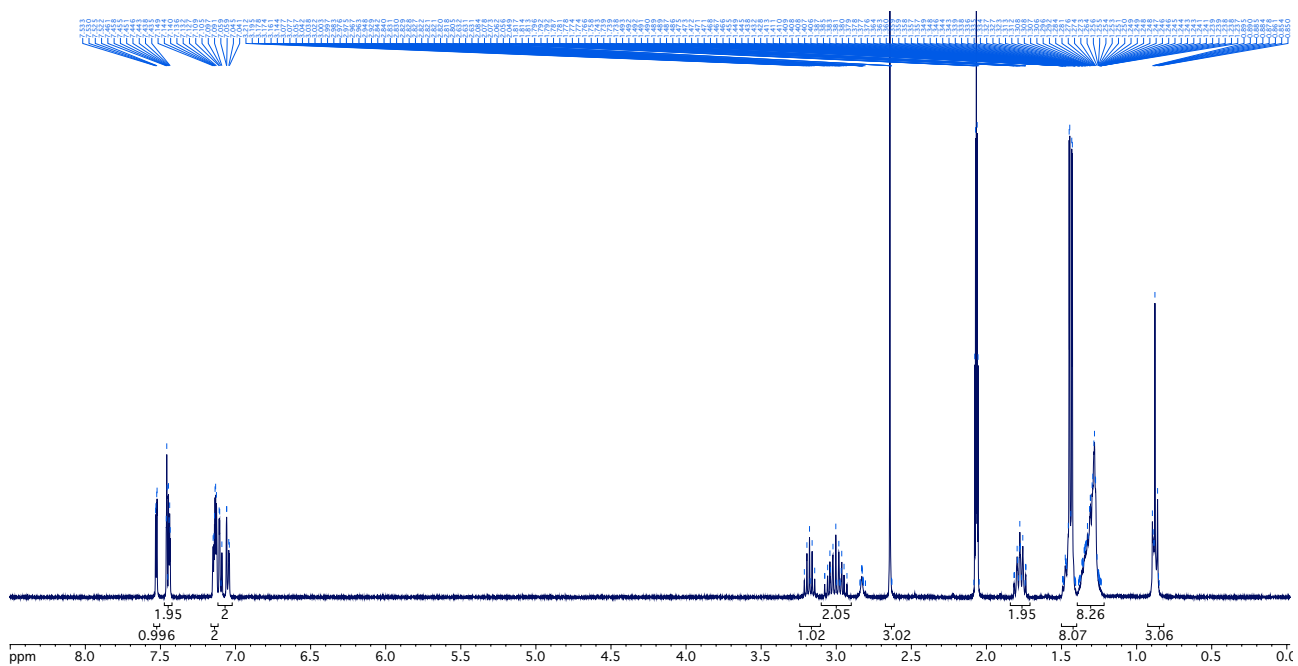

Figure S10.  $^1\text{H}$  NMR spectrum of Ru-2 (acetone  $d_6$ ).

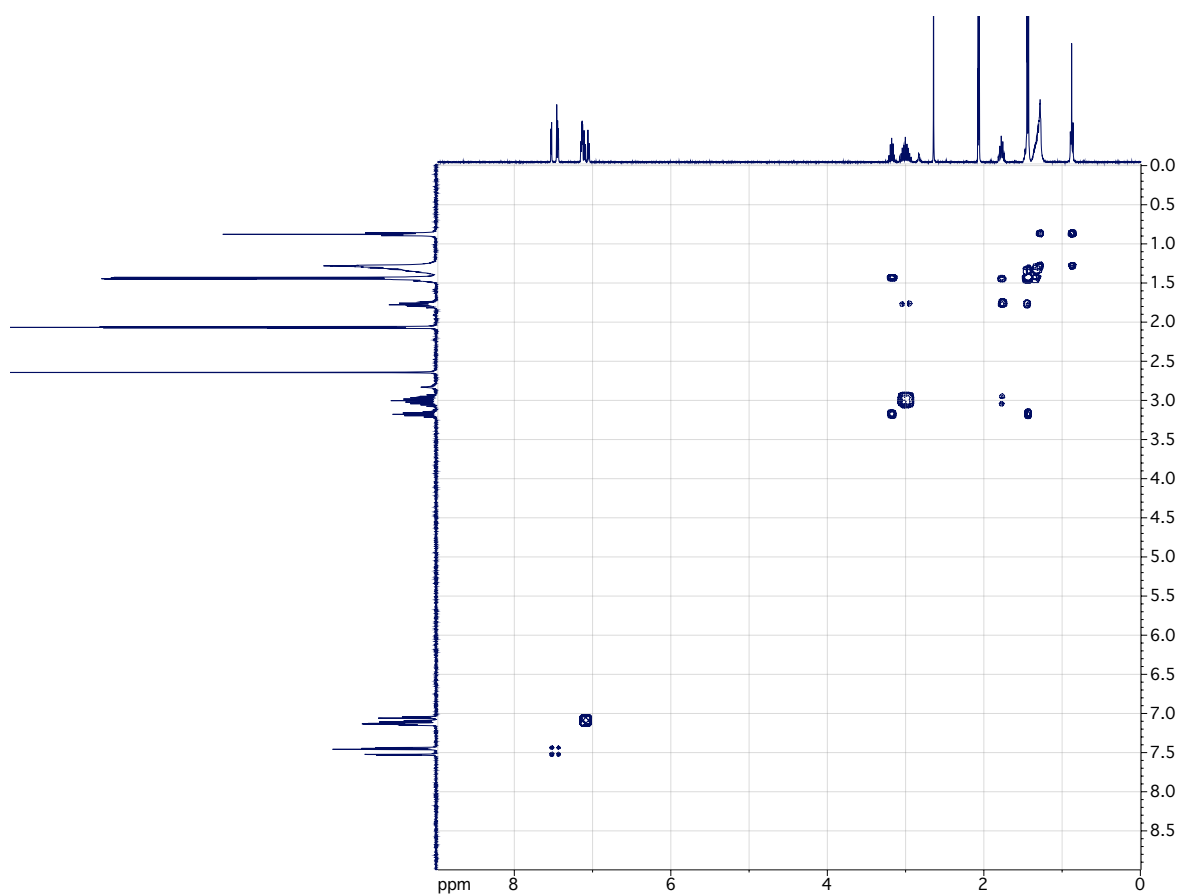

Figure S11. 2D COSY spectrum of Ru-2 (acetone  $d_6$ ).

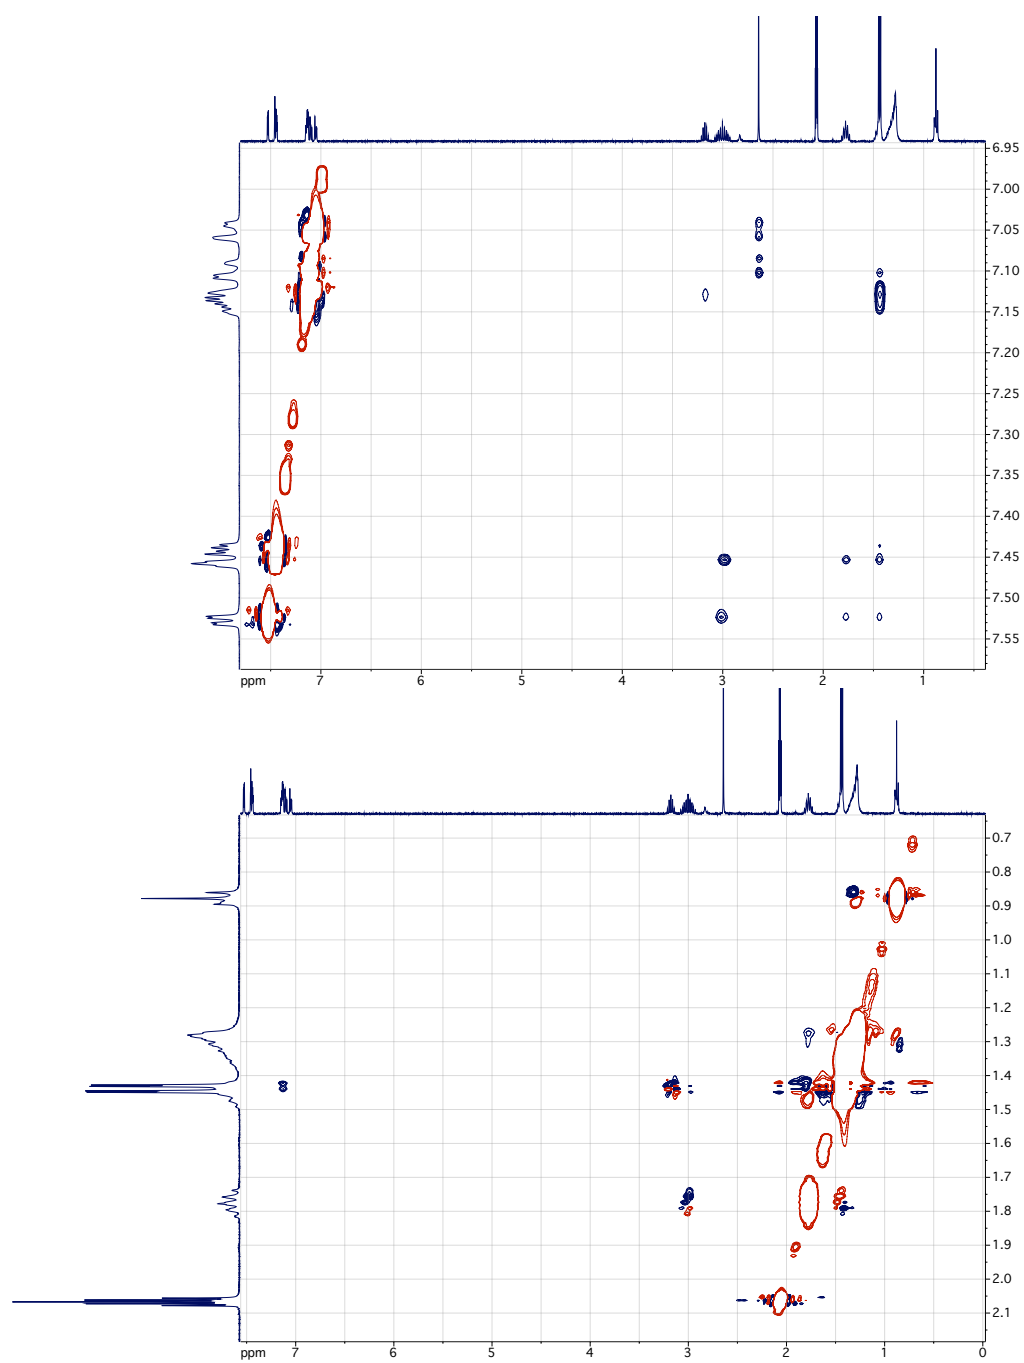

Figure S12. Sections of the 2D ROESY spectrum of Ru-2 (acetone d6).

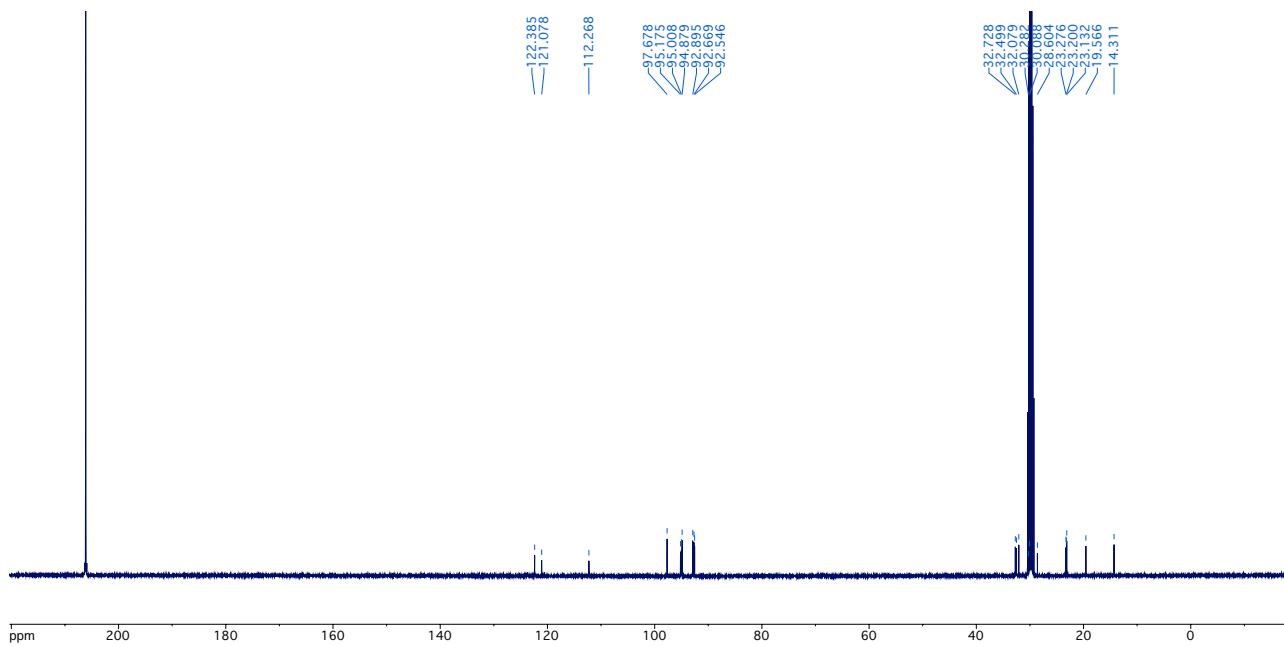

Figure S13.  $^{13}\text{C}$  NMR spectrum of Ru-2 (acetone d6).

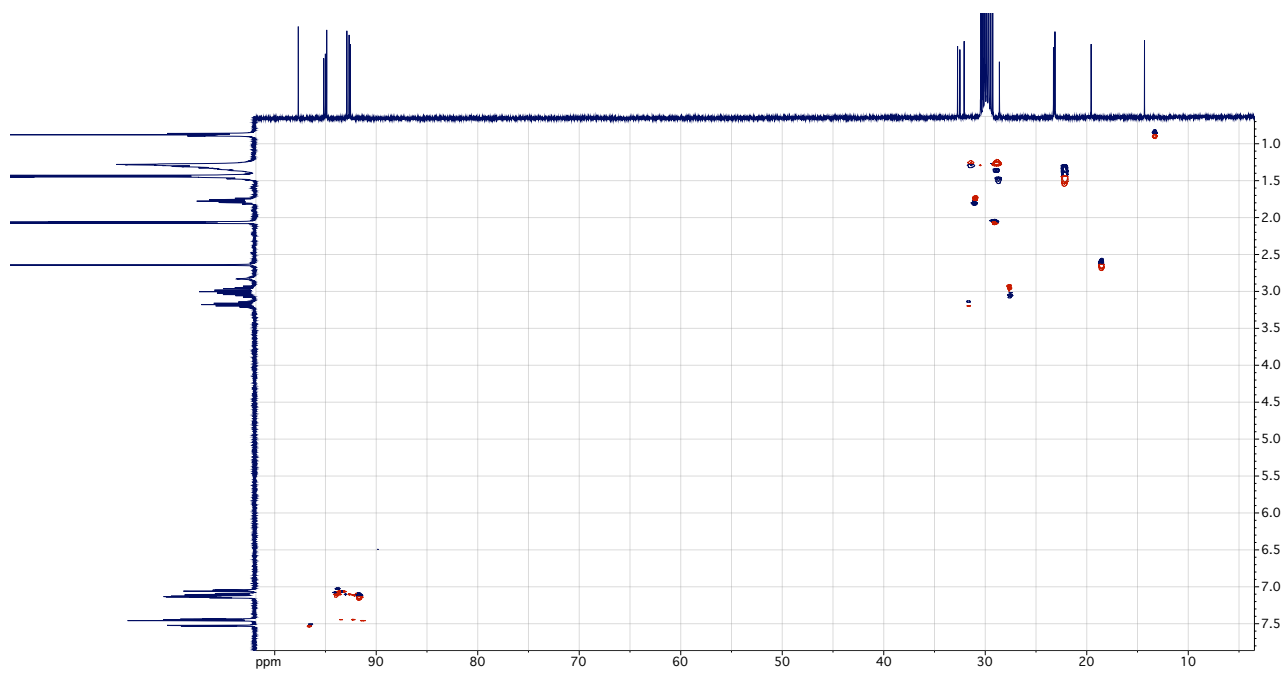

Figure S14. Section of the H-C HSQC spectrum of Ru-2 (acetone-d6).



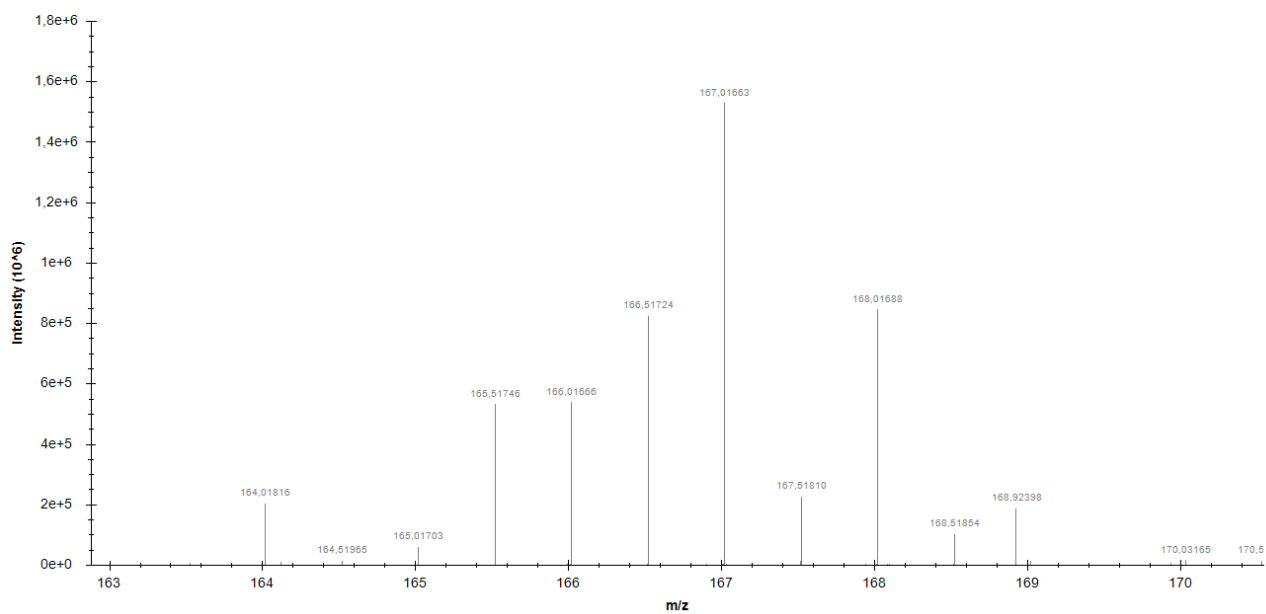

Figure S15. ESI-MS spectra of Ru-1.

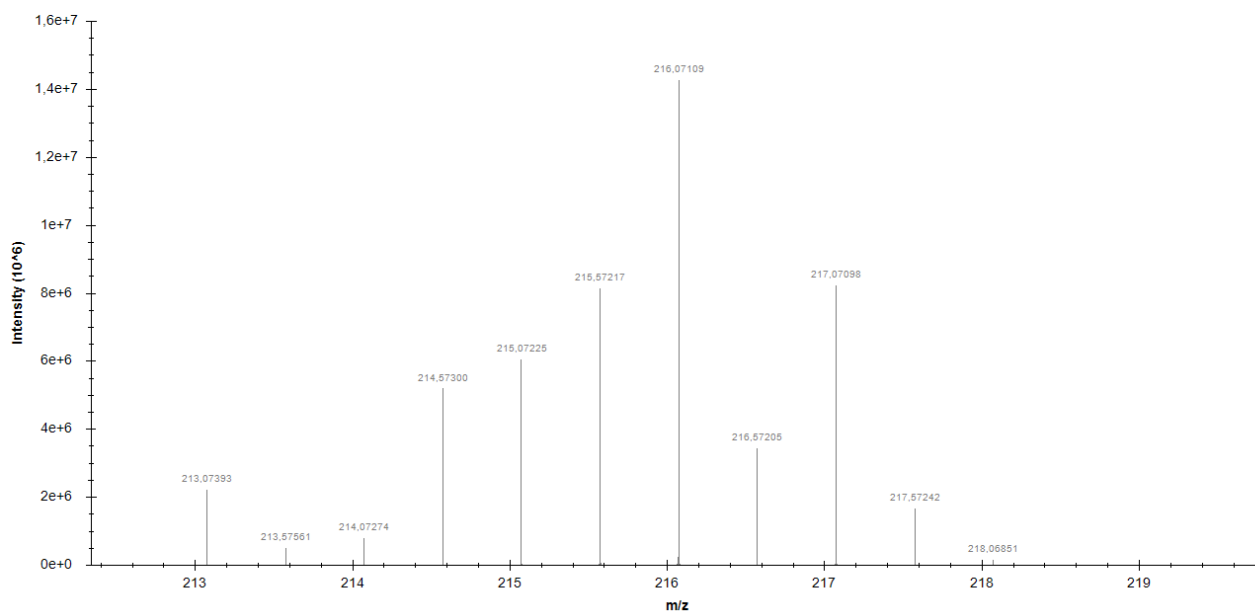

Figure S16. ESI-MS spectra of Ru-2.

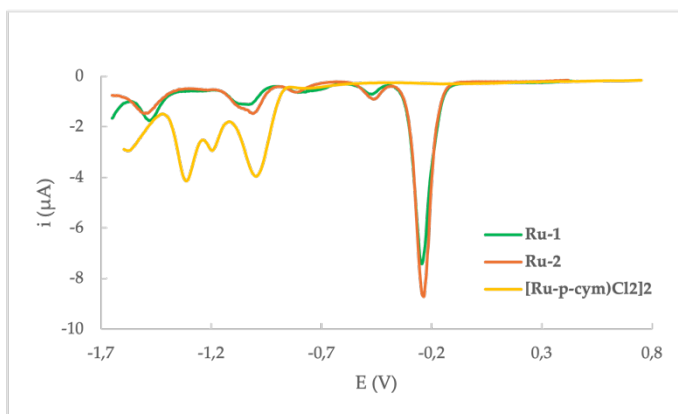

**Figure S17.** Differential pulse voltammograms curves of **Ru-1** and **Ru-2**, and of the parent complex  $[\text{Ru}(\text{p-cymene})\text{Cl}_2]_2$  in 0.1 M  $\text{TBAPF}_6\text{-CH}_3\text{CN}$  solvent system. Working electrode: Pt disk.
